# Supplementary material for: Copeptin, IGFBP-1, and Cardiovascular Prognosis in Patients With Type 2 Diabetes and Acute Myocardial Infarction: A report from the DIGAMI 2 trial
Source: PubMed Central journal article supplement — Diabetes Care. 2010 Apr 22;33(7):1604–6. doi: 10.2337/dc10-0088 (PMC2890367; doi:10.2337/dc10-0088), 2010-04-22

## ONLINE APPENDIX

**Table 1.** Baseline characteristics of 393 patients with both copeptin and IGFBP-1 levels available at admission for myocardial infarction. The data are presented as *n* (%) or median (quartile 1-quartile 3). All variables refer to admission values, unless otherwise stated.

| Variable                        | Value            |
|---------------------------------|------------------|
| Age (years)                     | 70.0 (60.8-77.0) |
| Male gender (n; %)              | 269 (68)         |
| BMI (kg/m <sup>2</sup> )        | 28 (25-31)       |
| Diabetes duration (years)       | 6.0 (1.5-14)     |
| Blood pressure (mmHg)           |                  |
| Systolic                        | 130 (120-150)    |
| Diastolic                       | 74 (63-85)       |
| Previous medical history (n; %) |                  |
| Myocardial infarction           | 148 (38)         |
| Angina pectoris                 | 201 (51)         |
| Heart failure                   | 78 (20)          |
| Hypertension                    | 215 (55)         |
| Hyperlipidemia                  | 135 (34)         |
| Current smoker                  | 84 (22)          |
| Medication prior to admission   |                  |
| Insulin                         | 135 (34)         |
| Metformin                       | 99 (25)          |
| Sulphonylurea                   | 153 (39)         |
| Beta-blocker                    | 175 (45)         |
| Aspirin                         | 206 (52)         |
| ACE inhibitor                   | 124 (32)         |
| Lipid lowering                  | 117 (30)         |
| Biochemistry at admission       |                  |
| Blood glucose (mmol/l)          | 11.8 (9.2-14.9)  |
| HbA1c* (%)                      | 7.1 (6.2-8.3)    |
| Serum creatinine (μmol/l)       | 92 (78-110)      |
| Creatinine clearance† (ml/min)  | 72 (50-93)       |
| Serum cholesterol (mmol/l)      | 5.0 (4.2-5.8)    |
| Serum triglycerides (mmol/l)    | 1.7 (1.2-2.6)    |

\* Analyzed by high-performance liquid chromatography with an upper normal limit of 5.3% (Boehringer Mannheim Scandinavian AB, Bromma, Sweden).

† Calculated using the Cockcroft-Gault method

**Table 2.** Copeptin and IGFBP values (median [quartile 1–quartile 3]) by gender and some biochemical and clinical characteristics.

| Variable                                            |                                       | p      |                                       | p      |
|-----------------------------------------------------|---------------------------------------|--------|---------------------------------------|--------|
| <b>Kruskal-Wallis test</b>                          | <b>Copeptin (pmol/l)</b>              |        | <b>IGFBP-1 (µg/l)</b>                 |        |
| <b>Males vs. females</b>                            | 20.2 (9.6-43.5) vs. 24.7 (10.0-63.1)  | 0.20   | 20.0 (11.0-43.0) vs. 30.0 (13.5-60.0) | 0.015  |
| <b>Age (below/above median)</b>                     | 14.7 (7.2-31.7) vs. 34.6 (13.5-72.6)  | <0.001 | 17.0 (9.0-33.5) vs. 32.0 (15.0-65.0)  | <0.001 |
| <i>Biochemistry at admission</i>                    |                                       |        |                                       |        |
| <b>Creatinine clearance* (below/above median)</b>   | 36.7 (13.6-69.6) vs. 13.8 (6.4-27.2)  | <0.001 | 35.0 (16.0-68.0) vs. 15.0 (9.0-31.0)  | <0.001 |
| <b>Glucose<sup>†</sup> (below/above median)</b>     | 18.3 (7.6-42.3) vs. 27.2 (11.9-58.1)  | 0.006  | 19.0 (10.0-44.0) vs. 25.5 (13.0-56.0) | 0.02   |
| <b>HbA1c<sup>‡</sup> (below/above median)</b>       | 22.8 (10.2-51.4) vs. 21.4 (8.2- 49.2) | 0.30   | 20.0 (11.0-45.0) vs. 24.0 (13.0-55.0) | 0.22   |
| <i>Previous medical history</i>                     |                                       |        |                                       |        |
| <b>MI vs. no previous MI</b>                        | 23.2 (10.2-56.2) vs. 21.2 (9.4-45.1)  | 0.19   | 24.5 (11.0-47.0) vs. 22.0 (12.0-52.0) | 0.71   |
| <b>Heart failure vs. no heart failure</b>           | 34.9 (16.7-66.4) vs. 19.4 (8.2-43.4)  | <0.001 | 26.0 (11.0-52.0) vs. 23.0 (12.0-51.0) | 0.56   |
| <b>Hypertension vs. no hypertension<sup>§</sup></b> | 21.3 (9.6-43.8) vs. 23.3 (9.7-56.4)   | 0.66   | 22.0 (11.0-54.0) vs. 24.0 (12.0-48.0) | 0.95   |
| <b>Spearman's rank correlation</b>                  | <b>Correlation coefficient</b>        |        | <b>Correlation coefficient</b>        |        |
| <b>Age</b>                                          | 0.41                                  | <0.001 | 0.28                                  | <0.001 |
| <b>BMI</b>                                          | -0.13                                 | 0.02   | -0.23                                 | <0.001 |
| <i>Biochemistry at admission</i>                    |                                       |        |                                       |        |
| <b>Creatinine clearance</b>                         | -0.45                                 | <0.001 | -0.40                                 | <0.001 |
| <b>Glucose</b>                                      | 0.17                                  | <0.001 | 0.15                                  | 0.004  |
| <b>HbA1c</b>                                        | -0.09                                 | 0.07   | 0.06                                  | 0.23   |
| <b>IGFBP-1</b>                                      | 0.53                                  | <0.001 |                                       |        |

Missing data \* n=13; † n= 2; ‡ n=: 36 § n= 1

**Figure 1.** Flow-chart for the DIGAMI 2 study including the randomised treatment groups and the present biochemical substudy. (AMI= acute myocardial infarction)

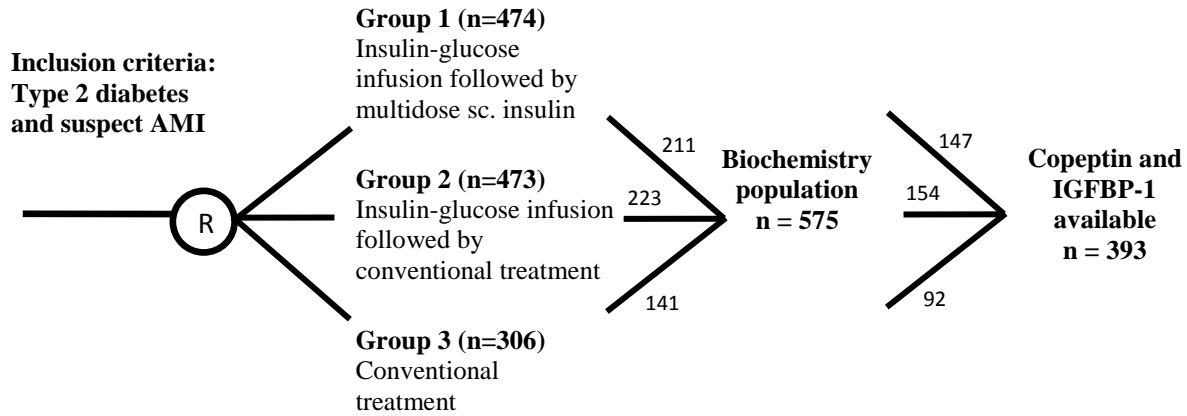

**Figure 2.** Kaplan-Meier curves for cardiovascular events by copeptin tertiles (log-rank test for trend  $p < 0.001$ ). Copeptin levels in each group, presented as min-max (median), were 0.97-12.5 (6.3) pmol/l in the low group 12.7-37.1 (21.8) pmol/l in the middle group and 37.8-1936 (66.8) pmol/l in the highest.

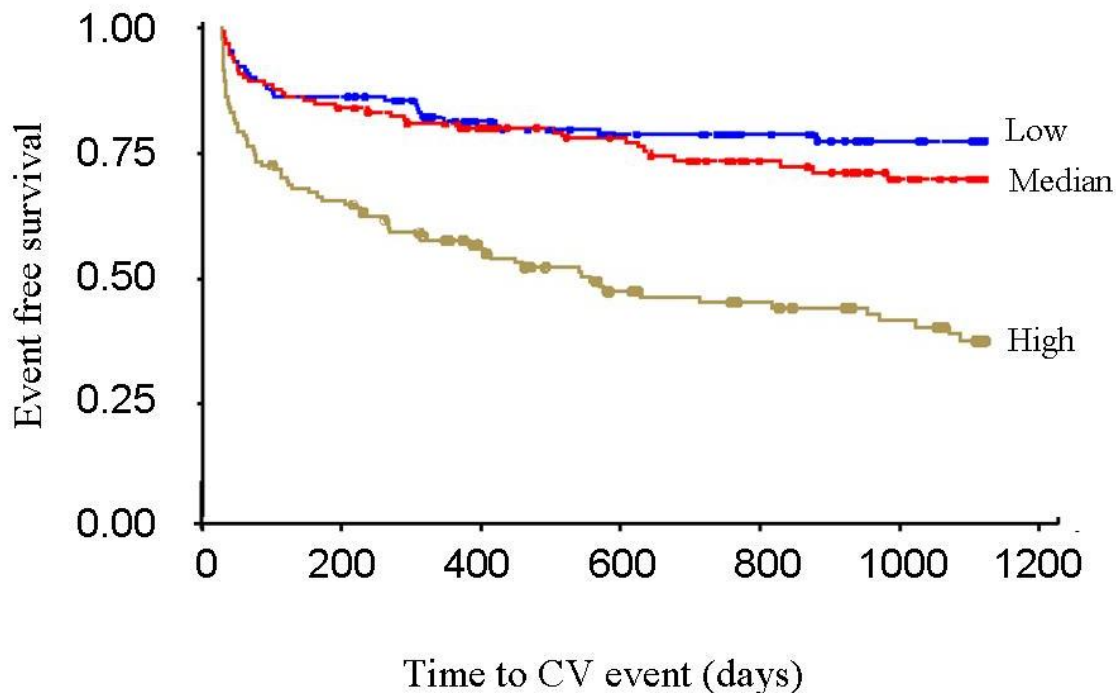

**Figure 3.** Copeptin levels (pmol/l) in patients who died from cardiovascular causes during the first 90 days (n=38) (1), after 90 days (n=39) (2) and who remained alive or died from non-cardiovascular causes (n=315) (3).

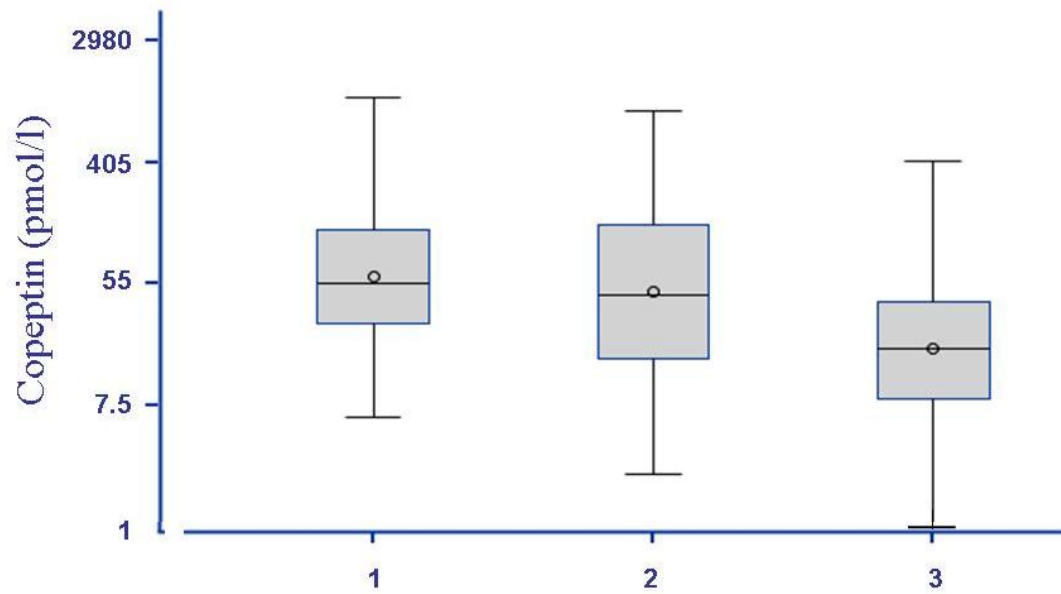

Supplement: supp_dc10-0088_dc100088_Online_appendix_revised.pdf [file supp_dc10-0088_dc100088_Online_appendix_revised.pdf]
